# Supplementary material for: Lone-pair self-containment in pyritohedron-shaped closed cavities: optimized hydrothermal synthesis, structure, magnetism and lattice thermal conductivity of Co15F2(TeO3)14
Source: Royal Society of Chemistry journal article supplement (doi:10.1039/c9dt04176a), 2020-01-01
Supplement: c9dt04176a1.pdf [file c9dt04176a1.pdf]

Supporting Information for:

**Lone-pair self-containment in pyritohedron-shaped closed  
cavities: Optimized hydrothermal synthesis, structure,  
magnetism and lattice thermal conductivity of  
 $\text{Co}_{15}\text{F}_2(\text{TeO}_3)_{14}$**

Minfeng Lü,<sup>a,\*</sup>  Jianhua Jiang,<sup>a</sup> Bei Zhu,<sup>a</sup> Yuwei Zhao,<sup>a</sup> Tianyu Zhu,<sup>a</sup> Haoming Yang,<sup>a</sup> Yong Jin,<sup>a</sup> Houria Kabbour,<sup>b</sup> Kwang-Yong Choi<sup>c</sup> and William T. A. Harrison<sup>d</sup>.

<sup>a</sup> School of Environmental & Chemical Engineering, Jiangsu University of Science and Technology, Zhenjiang 212003, Jiangsu, People's Republic of China

<sup>b</sup> Université Lille Nord de France, UMR 8181 CNRS, Unité de Catalyse et de Chimie du Solide (UCCS USTL), F-59655 Villeneuve d'Ascq, France

<sup>c</sup> Department of Physics, Chung-Ang University, 84 Heukseok-ro, Dongjak-gu, Seoul 06974, Republic of Korea

<sup>d</sup> Department of Chemistry, University of Aberdeen, Aberdeen, AB24 3UE, Scotland

\*To whom correspondence should be addressed

*E-mail address:* m.f.lv@hotmail.com (Minfeng Lü)

Figures

Figure S1. Calculated and observed powder X-ray diffraction patterns for  $\text{Co}_{15}\text{F}_2(\text{TeO}_3)_{14}$

Figure S2. The corresponding EDXRD spectra (I) for  $\text{Co}_{15}\text{F}_2(\text{TeO}_3)_{14}$

Figure S3. The corresponding EDXRD spectra (II) for  $\text{Co}_{15}\text{F}_2(\text{TeO}_3)_{14}$

Figure S4. Infrared spectra of  $\text{Co}_{15}\text{F}_2(\text{TeO}_3)_{14}$

Figure S5. UV/Vis/NIR absorption spectrum of  $\text{Co}_{15}\text{F}_2(\text{TeO}_3)_{14}$

Figure S6. UV-vis diffuse reflectance spectra of  $\text{Co}_{15}\text{F}_2(\text{TeO}_3)_{14}$ .

Figure S7. Co 2p doublet recorded for  $\text{Co}_{15}\text{F}_2(\text{TeO}_3)_{14}$ .

Figure S8. Co 2p doublet recorded for  $\text{Co}_{15}\text{F}_2(\text{TeO}_3)_{14}$ .

Figure S9. TGA diagram for  $\text{Co}_{15}\text{F}_2(\text{TeO}_3)_{14}$ .

Figure S10. View of Calculated Tellurium atoms lone pairs.

Figure S11. View down [001] of a slab of  $\text{Co}_{15}\text{F}_2(\text{TeO}_3)_{14}$  showing the honeycomb layers, built up from Co and Te centered polyhedral.

Figure S12. Lattice thermal conductivity as a function of temperature for  $\text{Co}_{15}\text{F}_2(\text{TeO}_3)_{14}$  samples.

## Tables

Table S1. BVS of the atoms in  $\text{Co}_{15}\text{F}_2(\text{TeO}_3)_{14}$

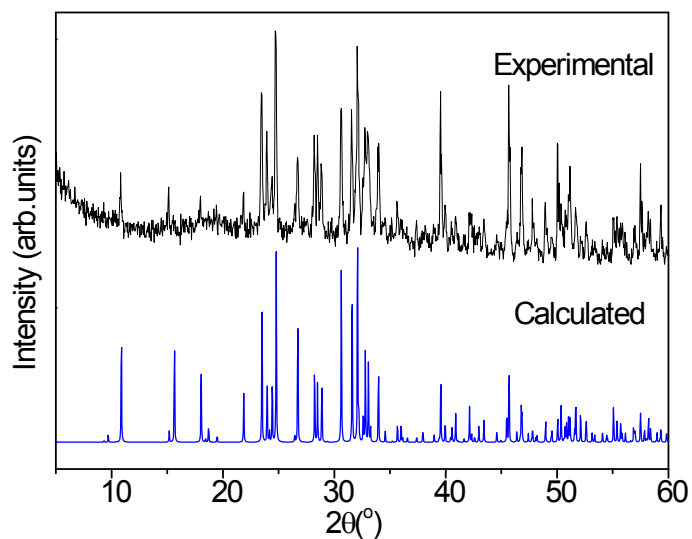

Figure S1. Calculated and observed powder X-ray diffraction patterns for  $\text{Co}_{15}\text{F}_2(\text{TeO}_3)_{14}$

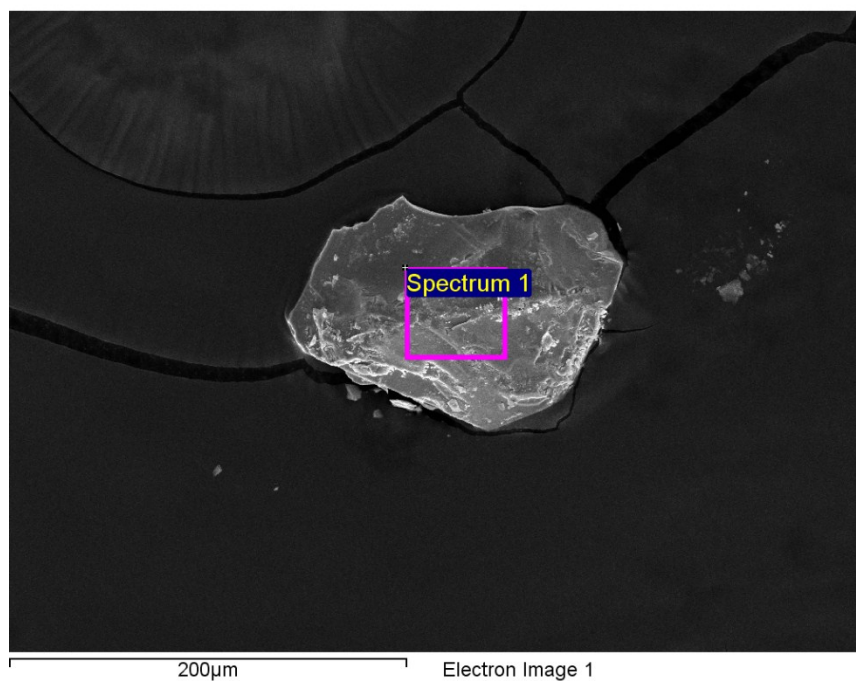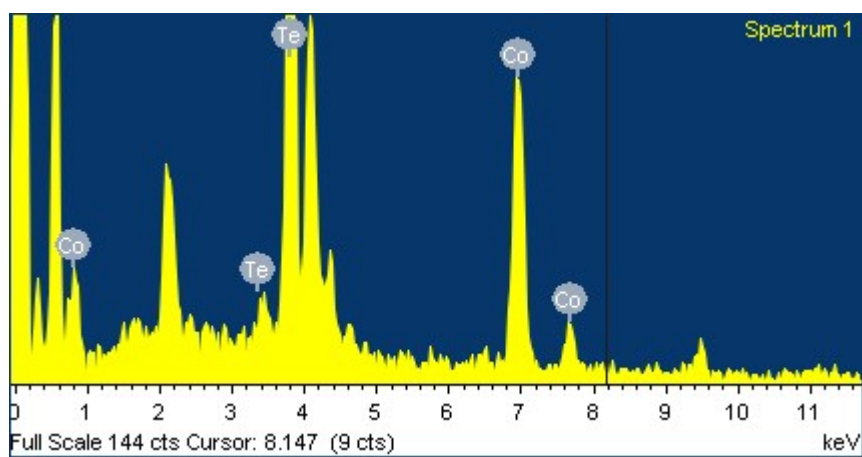

Figure S2. The corresponding EDXRD spectra (I) for  $\text{Co}_{15}\text{F}_2(\text{TeO}_3)_{14}$

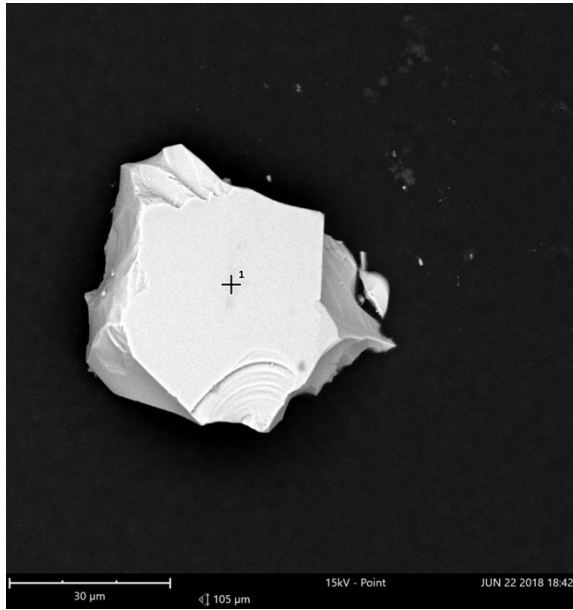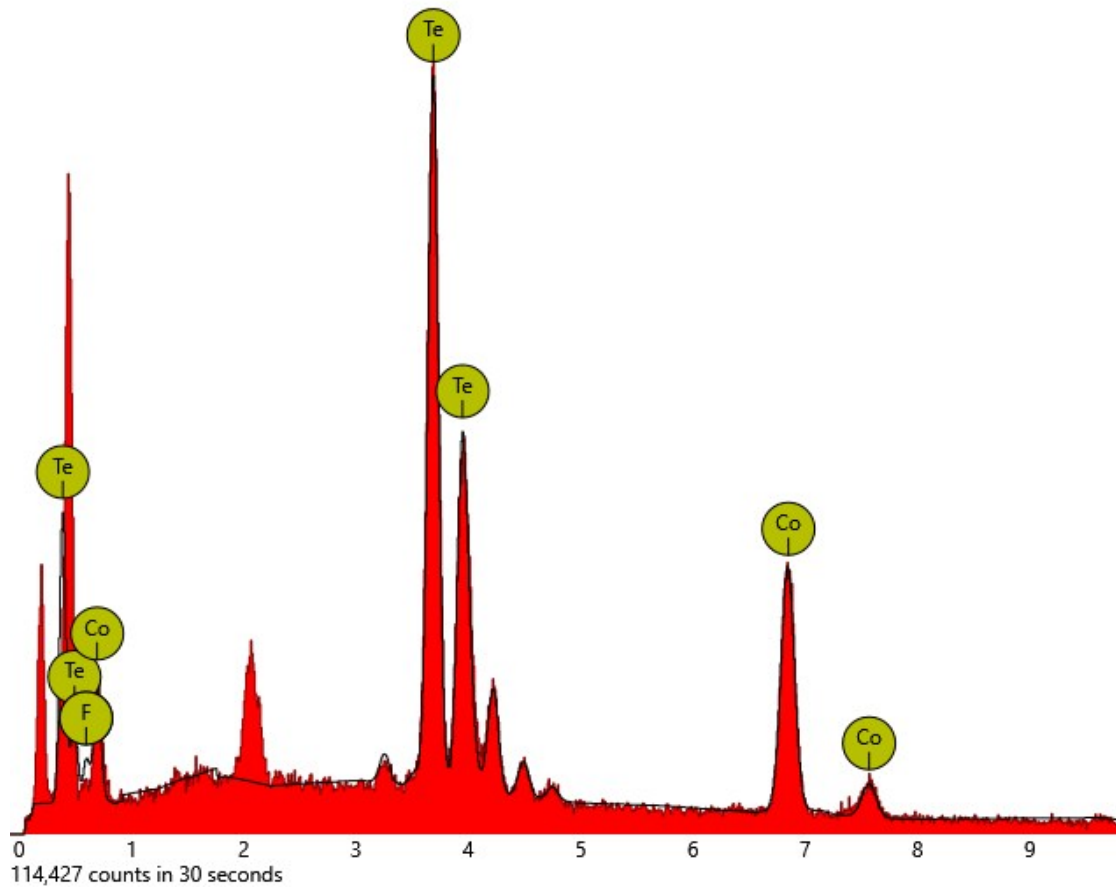

Figure S3. The corresponding EDXRD spectra (II) for  $\text{Co}_{15}\text{F}_2(\text{TeO}_3)_{14}$

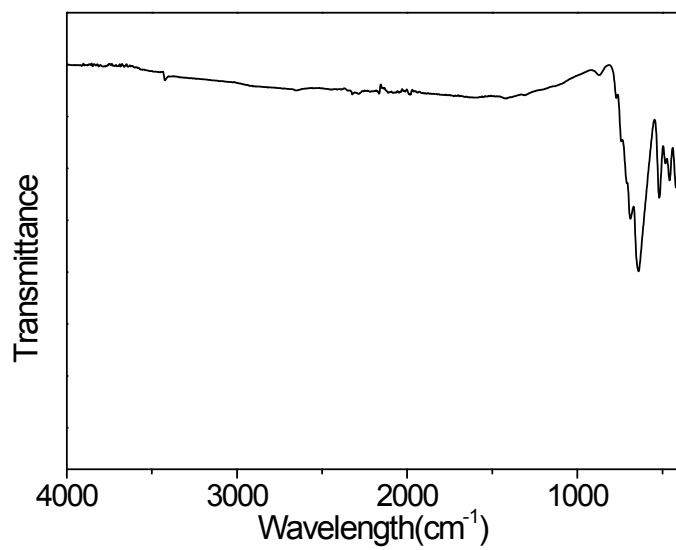

Figure S4. Infrared spectra of  $\text{Co}_{15}\text{F}_2(\text{TeO}_3)_{14}$

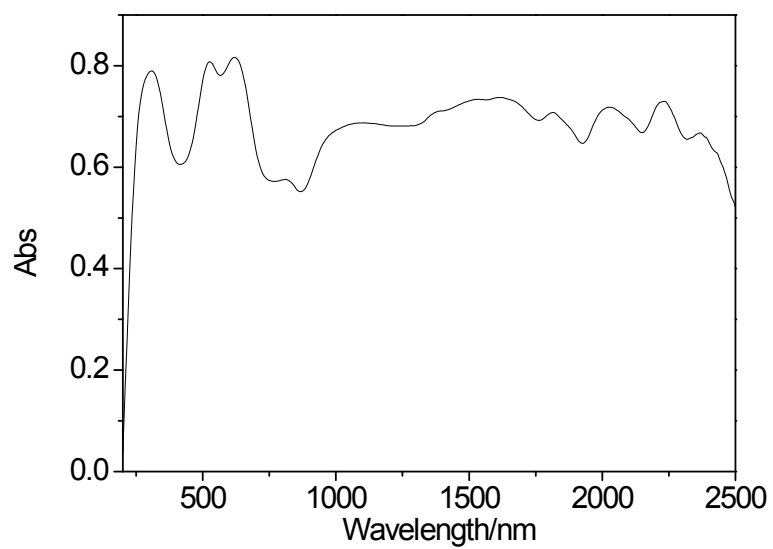

Figure S5. UV/Vis/NIR absorption spectrum of  $\text{Co}_{15}\text{F}_2(\text{TeO}_3)_{14}$

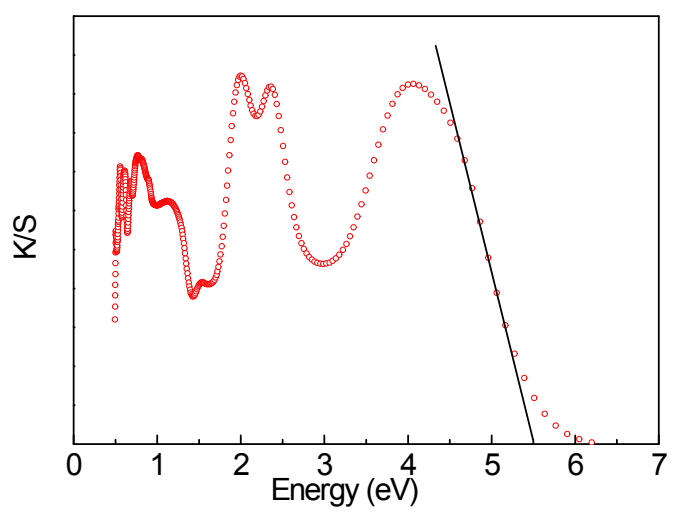

Figure S6. UV-vis diffuse reflectance spectra of  $\text{Co}_{15}\text{F}_2(\text{TeO}_3)_{14}$ .

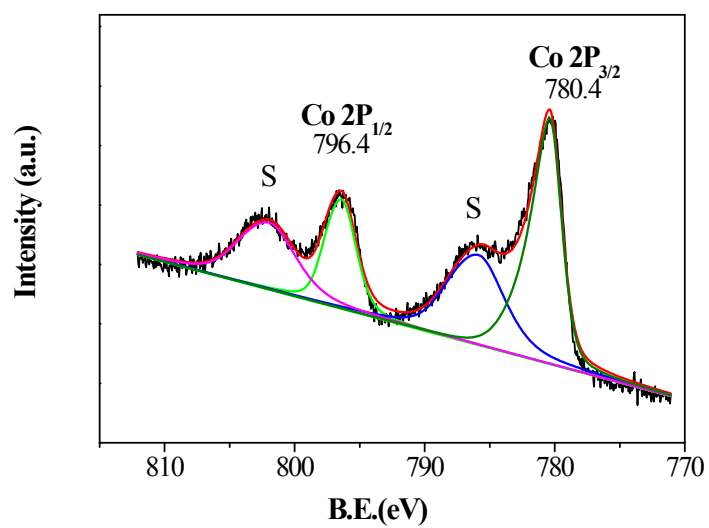

Figure S7. Co 2p doublet recorded for  $\text{Co}_{15}\text{F}_2(\text{TeO}_3)_{14}$ .

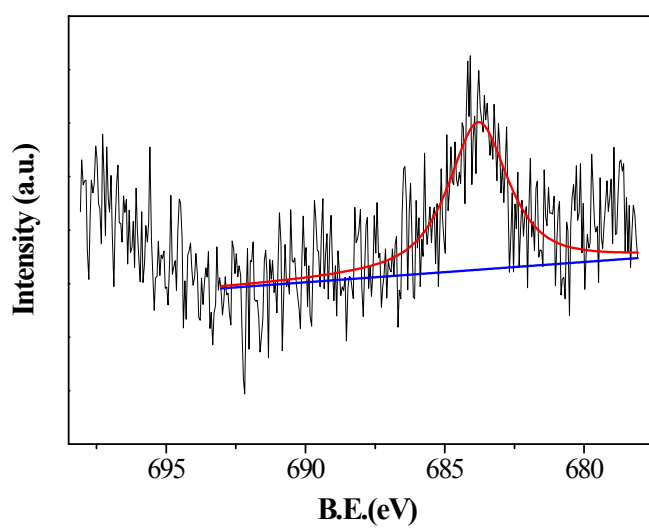

Figure S8. F 1s core level for  $\text{Co}_{15}\text{F}_2(\text{TeO}_3)_{14}$ .

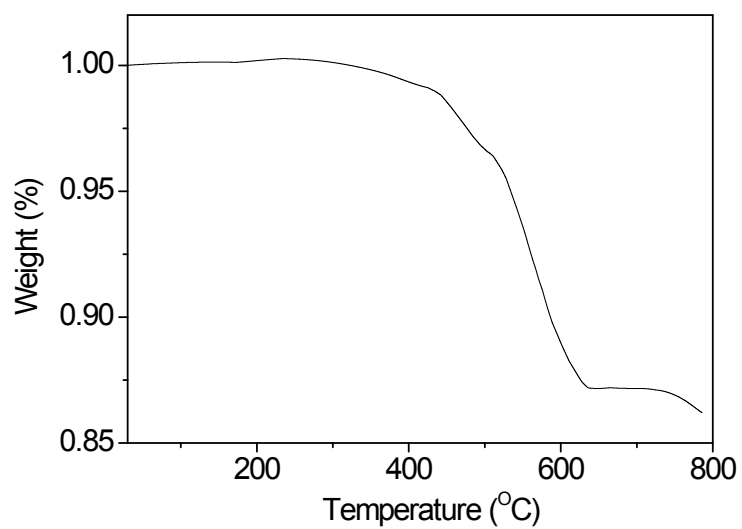

Figure S9. TGA diagram for  $\text{Co}_{15}\text{F}_2(\text{TeO}_3)_{14}$ .

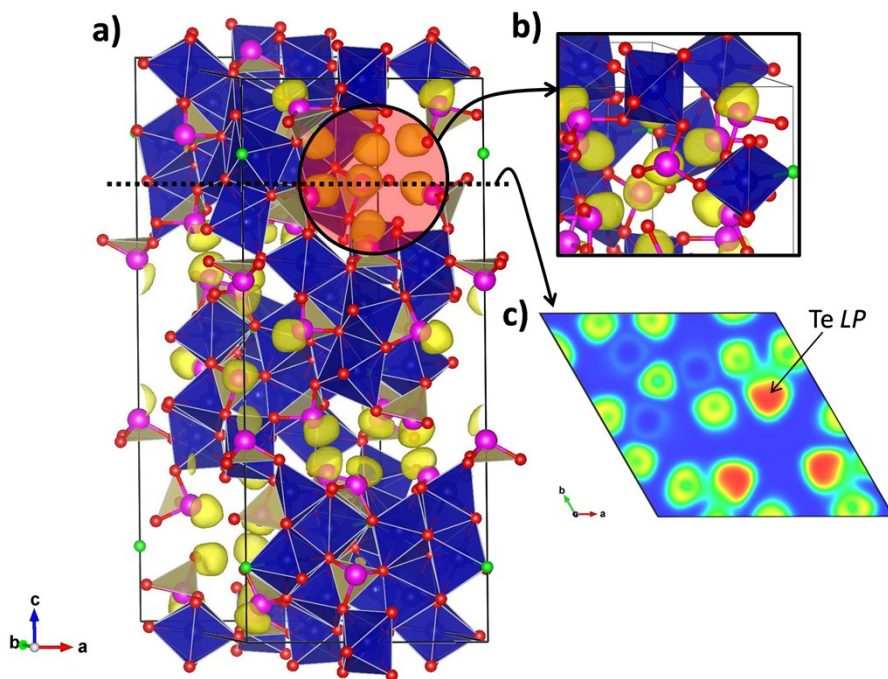

Figure S10. View of Calculated Tellurium atoms lone pairs.

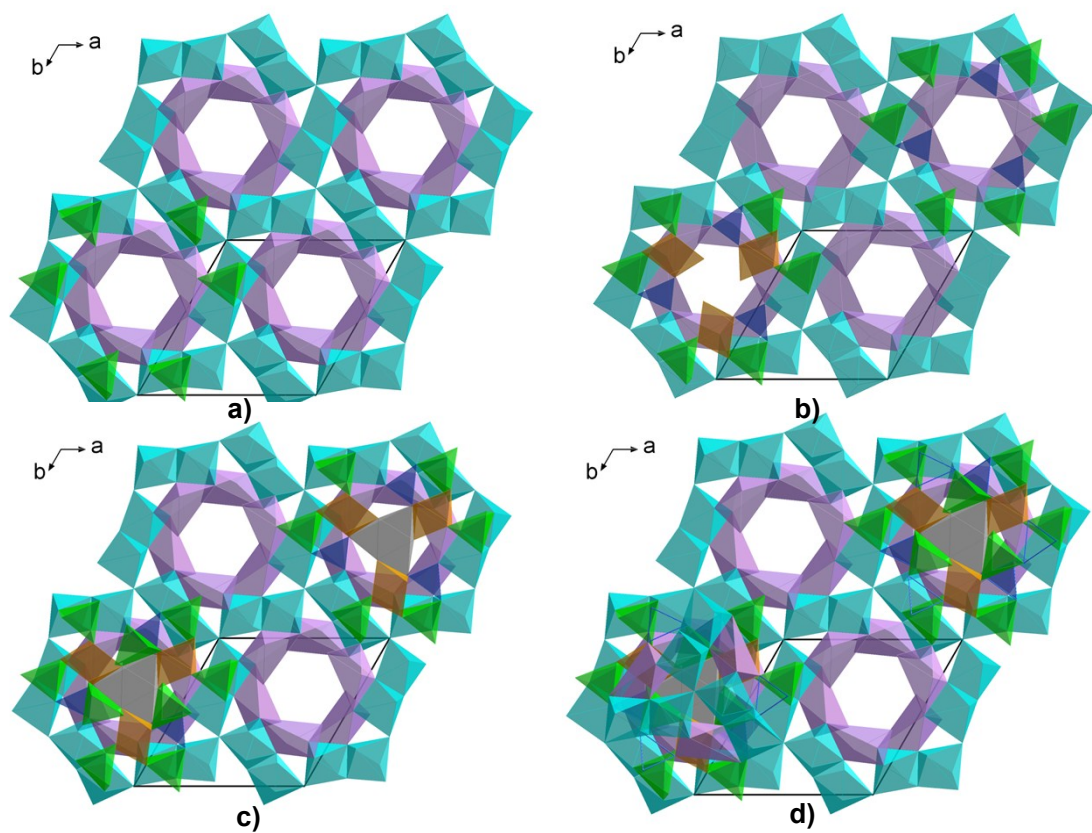

Figure S11: View down [001] of a slab of  $\text{Co}_{15}\text{F}_2(\text{TeO}_3)_{14}$  showing the honeycomb layers, built up from Co and Te centered polyhedral. a-f:



a) The way the Co and Te centered polyhedral cap the top and bottom of each 12 ring of Co<sub>3</sub> (turquoise) units and 6 rings of Te<sub>2</sub> (lavender) groups (12-Co<sub>3</sub>+6-Te<sub>2</sub> ring) result in closed pyritohedron-shaped cavities are shown sequentially: a) “empty” 12+6 ring hole (*top right*), 12-Co<sub>3</sub>+6-Te<sub>2</sub> ring with capped hexads of Co<sub>2</sub> (bright green) centered groups (6-Co<sub>2</sub>) on both sides (*bottom left*).

b) 12-Co<sub>3</sub>+6-Te<sub>2</sub> ring+ 6-Co<sub>2</sub> attached with trios of Te<sub>2</sub> centered groups (3-Te<sub>2</sub>) (light blue) on both sides (*top right*), 12-Co<sub>3</sub>+6-Te<sub>2</sub> ring + 6-Co<sub>2</sub>+3-Te<sub>2</sub> attached with trios of Co<sub>1</sub> (light orange)-centered groups (3-Co<sub>1</sub>) attached on both sides (*bottom left*).

c) 12-Co<sub>3</sub>+6-Te<sub>2</sub> ring+6-Co<sub>2</sub>+3-Te<sub>2</sub>+3-Co<sub>1</sub> attached with one of Te<sub>1</sub> (gray) centered groups (1-Te<sub>1</sub>) on both sides (*top right*). *Another trio of Co<sub>2</sub>-centered polyhedral capped the top of trios of Co<sub>1</sub>-centered octahedron (bottom left).*

d) *Another trio of Te<sub>3</sub>-centered polyhedral attached to the trios of Co<sub>1</sub> and the abovementioned trios of Co<sub>2</sub>-centered groups (top right). Another Co<sub>3</sub>/Te<sub>2</sub>-centered polyhedral in the next Co<sub>3</sub>/Te<sub>2</sub> layer attached the abovementioned trios of the Co<sub>2</sub> layer (bottom left).*

e) These honeycomb layers fused sequentially to form a continuous, three-dimensional structure, which encloses pyritohedron-shaped Te(IV) lone-pair self-contained cavities.

f) Note that rhombohedral crystal symmetry dictates that, with respect to the  $z$  direction, the adjacent basal Co<sub>3</sub> sheets are laterally displaced from each other by  $x = 1/3$  and  $y = 2/3$ . Thus, additional Co<sub>3</sub> sheets capped afterwards face on the center of Co<sub>12</sub> polyhedral units along the [001] direction in the next sheet, and there are no continuous channels of any significant size in this structure.

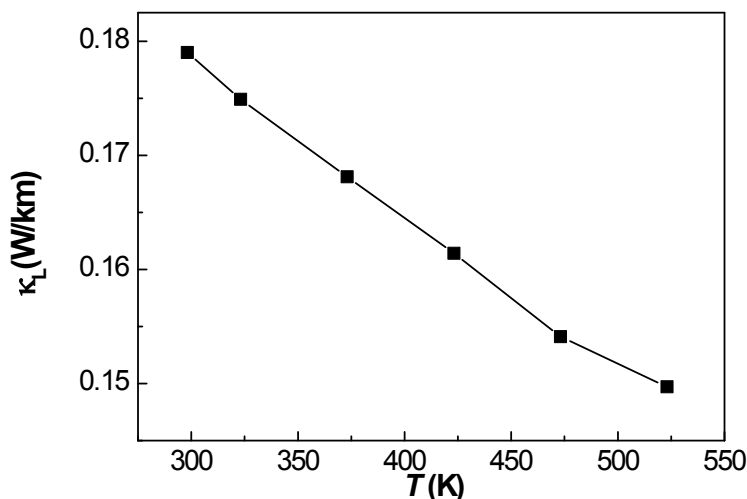

Figure S12. Lattice thermal conductivity as a function of temperature for  $\text{Co}_{15}\text{F}_2(\text{TeO}_3)_{14}$  samples.

**Table S1.** BVS of the atoms in  $\text{Co}_{15}\text{F}_2\text{O}_{42}\text{Te}_{14}$ .

| <i>Atom</i> * | <i>BVS</i> |
|---------------|------------|
| Te1           | 4.06(3)    |
| Te2           | 4.28(3)    |
| Te3           | 4.03(3)    |
| Co1           | 1.965(10)  |
| Co2           | 1.810(10)  |
| Co3           | 1.983(9)   |
| O1            | -1.964(17) |
| O2            | -2.197(14) |
| O3            | -2.162(14) |
| O4            | -1.93(2)   |
| O5            | -2.041(16) |
| O6            | -1.898(16) |
| O7            | -1.942(14) |
| F1            | -0.964(2)  |

\* (*R*, *b*) parameters:  $\text{Te}^{4+}\text{-O}$  (1.977, 0.37),  $\text{Co}^{2+}\text{-O}$  (1.692, 0.37),  $\text{Co}^{2+}\text{-F}$  (1.640, 0.37)
